# Supplementary material
Source: PubMed Central journal article supplement (PMC4390166)
Supplement: Supp_Fig1.pdf [file Supp_Fig1.pdf]

## Supplementary Data

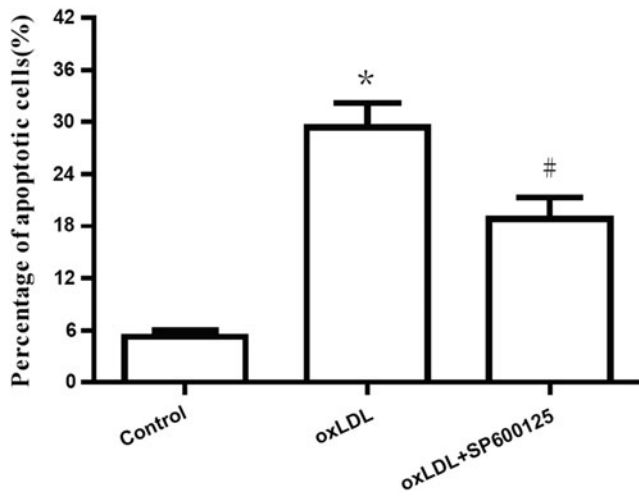

**SUPPLEMENTARY FIG. S1.** c-Jun NH(2)-terminal kinase (JNK)/c-Jun mediates oxidized low-density lipoprotein (oxLDL)-induced apoptosis. RAW264.7 cells were treated with oxLDL with or without the presence of 25 nM of JNK inhibitor SP600125 for 24 h. Data are presented as the mean  $\pm$  SEM of at least three independent experiments. \* $p < 0.05$  versus nontreated control; # $p < 0.05$  versus oxLDL-treated group.
